# Supplementary material for: Uptake of infant and pre-school immunisations in Scotland and England during the COVID-19 pandemic: an observational study of routinely collected data
Source: bioRxiv or medRxiv preprint supplement (doi:10.1101/2021.07.19.21260770), 2021-07-22

All doses 6in1

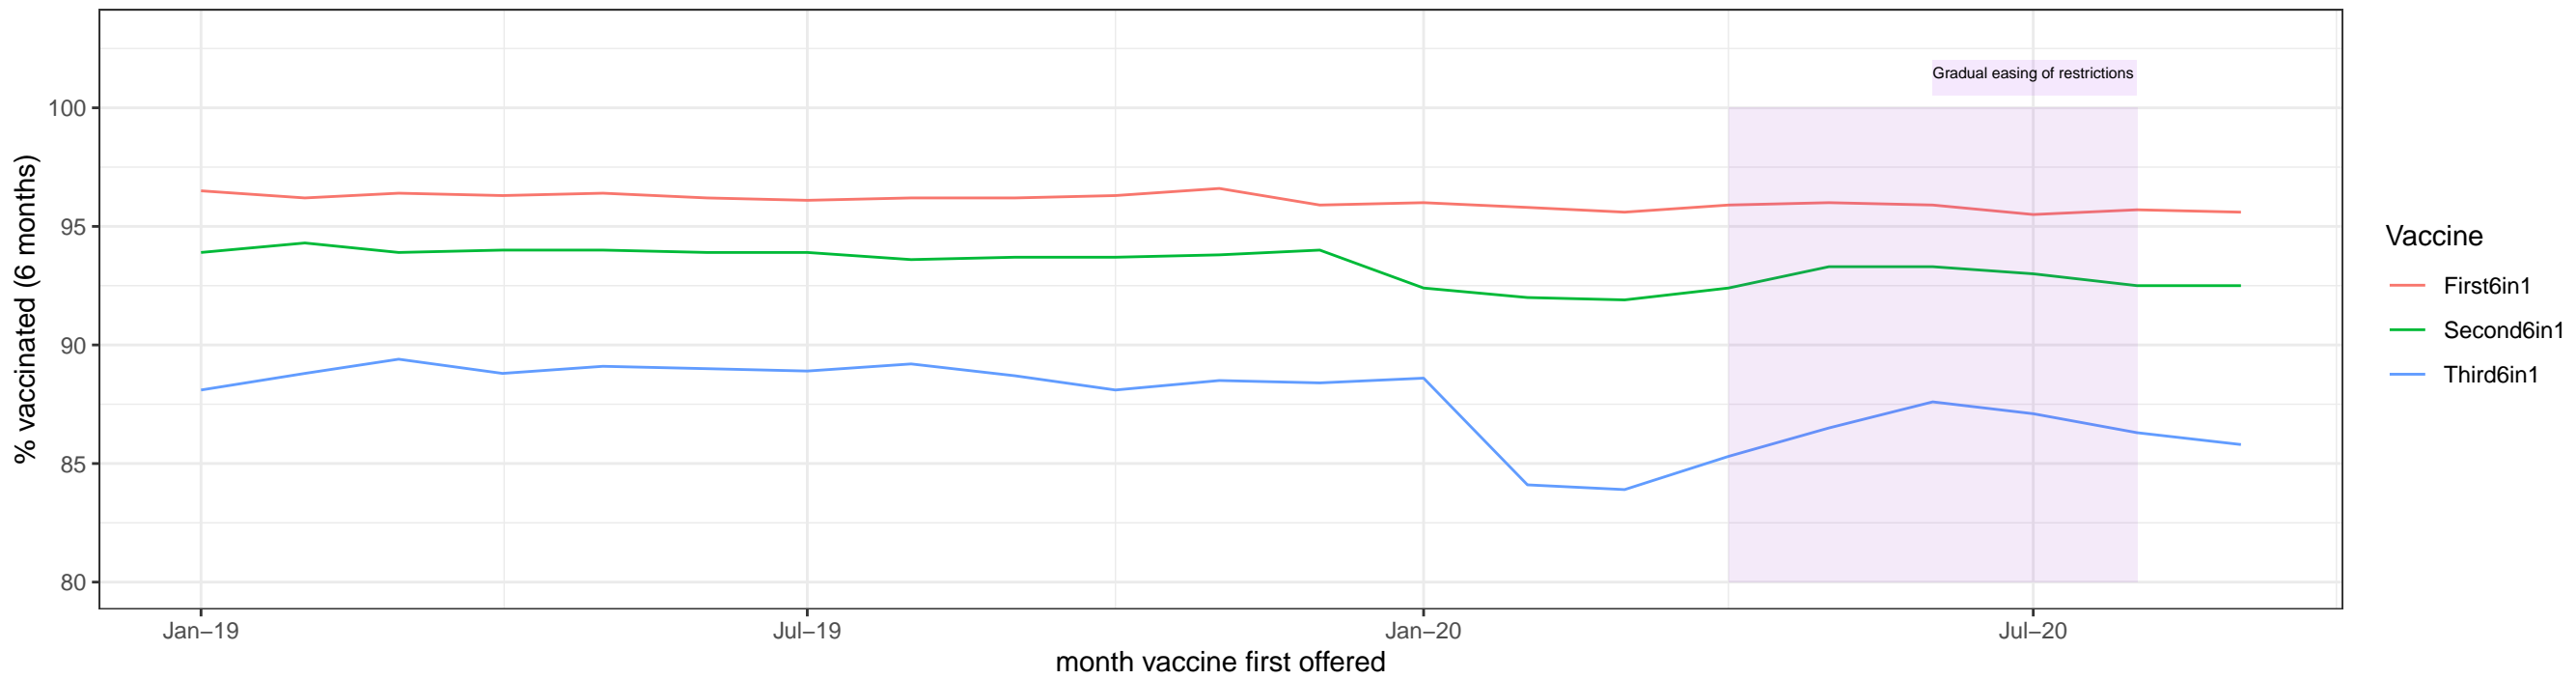

One dose MMR

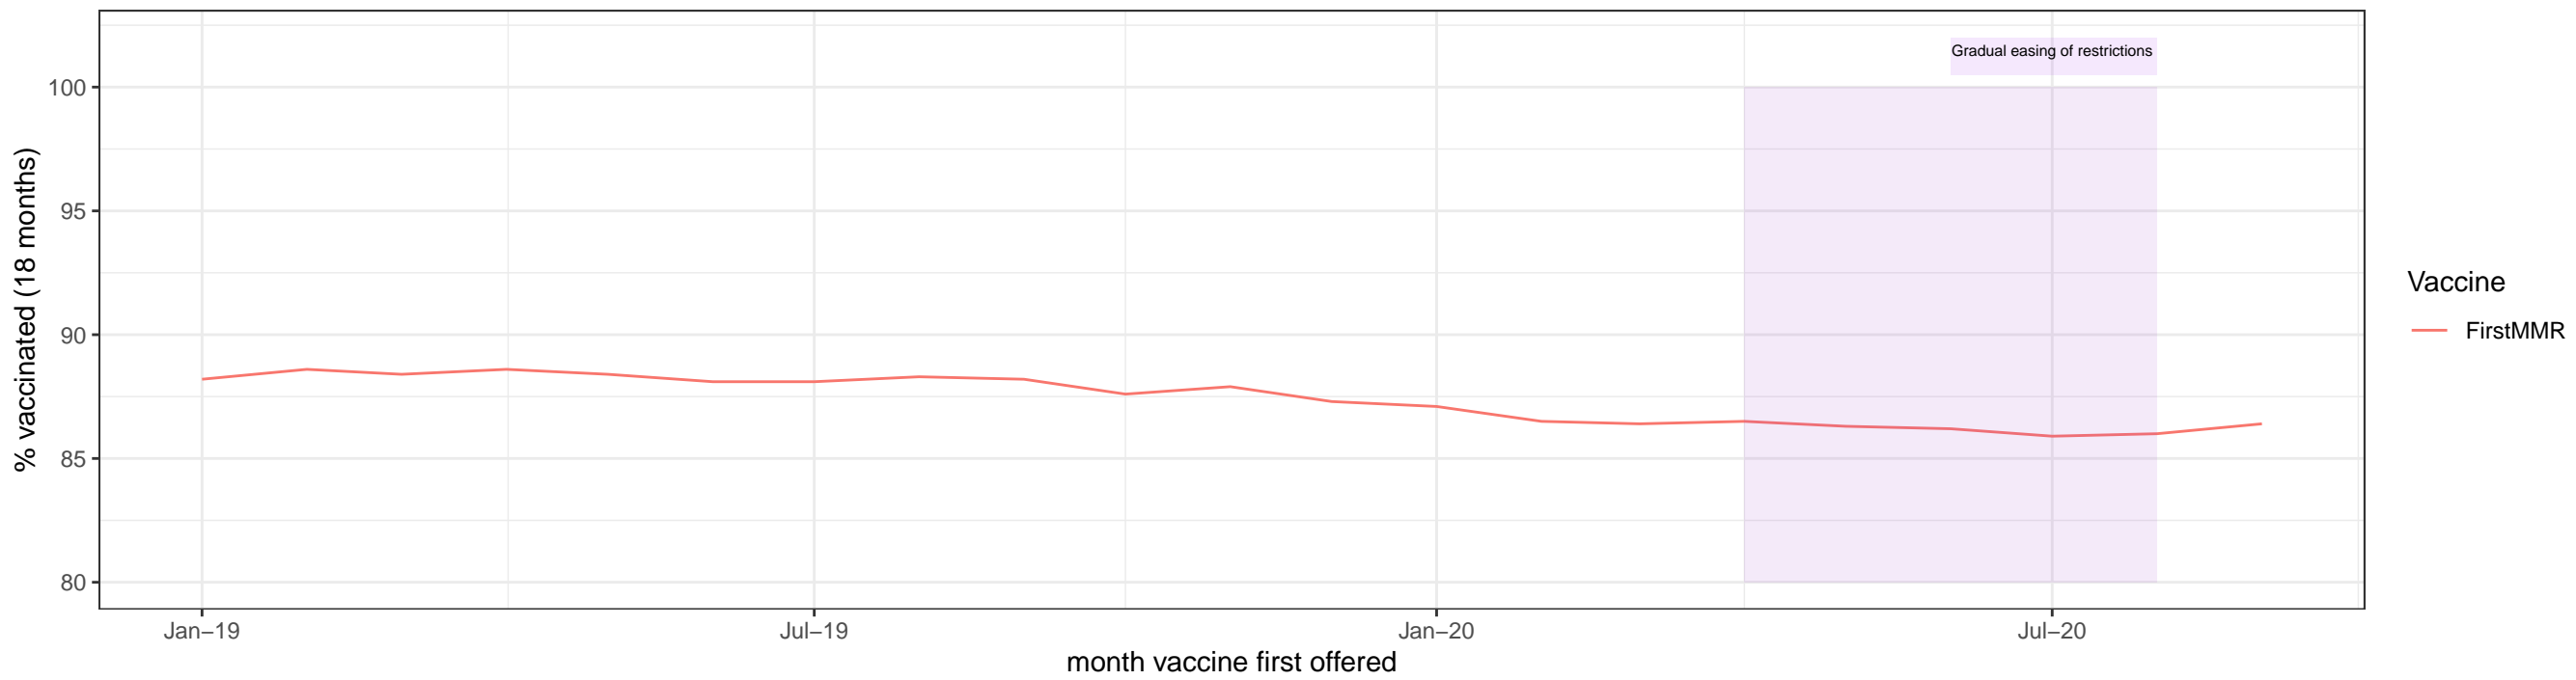

Supplement: Supplementary file [file media-8.pdf]
